# Supplementary material for: Exploring the pharmacological mechanism of Shengjing capsule on male infertility by a network pharmacology approach
Source: BMC Complement Med Ther. 2022 Nov 18;22:299. doi: 10.1186/s12906-022-03774-z (PMC9675225; doi:10.1186/s12906-022-03774-z)
Supplement: Supplementary file 1 — Additional file 1: [file 12906_2022_3774_MOESM1_ESM.xlsx]

## Sheet: Sheet1
No.	MOL	GeneName	gene_symbol
1	MOL001439	Prostaglandin G/H synthase 1	PTGS1
2	MOL001439	Prostaglandin G/H synthase 2	PTGS2
3	MOL001439	Retinoic acid receptor RXR-alpha	RXRA
4	MOL001439	Transient receptor potential cation channel subfamily V member 1	TRPV1
5	MOL001439	Retinoic acid receptor RXR-gamma	RXRG
6	MOL001439	Sodium-dependent noradrenaline transporter	SLC6A2
7	MOL001439	Transcription factor p65	RELA
8	MOL001439	G1/S-specific cyclin-D1	CCND1
9	MOL001439	Mitogen-activated protein kinase 1	MAPK1
10	MOL001439	Pro-epidermal growth factor	EGF
11	MOL001439	Cell division protein kinase 4	CDK4
12	MOL001439	Caspase-3	CASP3
13	MOL001439	Probable E3 ubiquitin-protein ligase HERC5	HERC5
14	MOL001439	Peroxisome proliferator activated receptor gamma	PPARG
15	MOL001439	Glucose-6-phosphate 1-dehydrogenase	G6PD
16	MOL001439	Tumor necrosis factor receptor superfamily member 1A	TNFRSF1A
17	MOL001439	Protein kinase C beta type	PRKCB
18	MOL001439	Platelet endothelial cell adhesion molecule	PECAM1
19	MOL001439	Nitric oxide synthase, endothelial	NOS3
20	MOL001439	Arachidonate 5-lipoxygenase	ALOX5
21	MOL001439	Cytosolic phospholipase A2	PLA2G4A
22	MOL001439	Phosphatidylinositol-3,4,5-trisphosphate 3-phosphatase and dual-specificity protein phosphatase PTEN	PTEN
23	MOL001439	P-selectin	SELP
24	MOL001439	Prostaglandin E synthase	PTGES
25	MOL001439	Beta-galactosidase	GLB1
26	MOL001439	Aldehyde dehydrogenase, mitochondrial	ALDH2
27	MOL001439	ATP-binding cassette sub-family A member 1	ABCA1
28	MOL001439	Aldehyde dehydrogenase, dimeric NADP-preferring	ALDH3A1
29	MOL001439	Mitochondrial uncoupling protein 2	UCP2
30	MOL001439	Complement C1r subcomponent	C1R
31	MOL001439	Cholesteryl ester transfer protein	CETP
32	MOL001439	ATP-binding cassette sub-family G member 1	ABCG1
33	MOL001439	Multidrug resistance-associated protein 4	ABCC4
34	MOL001439	Potassium channel subfamily K member 10	KCNK10
35	MOL001439	Tumor necrosis factor receptor superfamily member 1B	TNFRSF1B
36	MOL001439	Prostaglandin E synthase 2	PTGES2
37	MOL001439	Potassium channel subfamily K member 2	KCNK2
38	MOL001439	Collagen alpha-2(I) chain	COL1A2
39	MOL001323	Progesterone receptor	PGR
40	MOL001323	Prostaglandin G/H synthase 2	PTGS2
41	MOL001323	Gamma-aminobutyric acid receptor subunit alpha-1	GABRA1
42	MOL001323	Alcohol dehydrogenase 1C	ADH1C
43	MOL001323	Cytochrome P450-cam	CYP101A
44	MOL001323	Mineralocorticoid receptor	NR3C2
45	MOL001979	Progesterone receptor	PGR
46	MOL001979	Mineralocorticoid receptor	NR3C2
47	MOL001979	Nuclear receptor coactivator 2	NCOA2
48	MOL000449	Progesterone receptor	PGR
49	MOL000449	Mineralocorticoid receptor	NR3C2
50	MOL000449	Nuclear receptor coactivator 2	NCOA2
51	MOL000449	Alcohol dehydrogenase 1C	ADH1C
52	MOL000449	Ig gamma-1 chain C region	IGHG1
53	MOL000449	Retinoic acid receptor RXR-alpha	RXRA
54	MOL000449	Nuclear receptor coactivator 1	NCOA1
55	MOL000449	Prostaglandin G/H synthase 1	PTGS1
56	MOL000449	Prostaglandin G/H synthase 2	PTGS2
57	MOL000449	Alpha-2A adrenergic receptor	ADRA2A
58	MOL000449	Sodium-dependent noradrenaline transporter	SLC6A2
59	MOL000449	Sodium-dependent dopamine transporter	SLC6A3
60	MOL000449	Beta-2 adrenergic receptor	ADRB2
61	MOL000449	Aldose reductase	AKR1B1
62	MOL000449	Urokinase-type plasminogen activator	PLAU
63	MOL000449	Leukotriene A-4 hydrolase	LTA4H
64	MOL000449	Amine oxidase [flavin-containing] B	MAOB
65	MOL000449	Amine oxidase [flavin-containing] A	MAOA
66	MOL000449	mRNA of PKA Catalytic Subunit C-alpha	PRKACA
67	MOL000449	Chymotrypsinogen B	CTRB1
68	MOL000449	Muscarinic acetylcholine receptor M3	CHRM3
69	MOL000449	Muscarinic acetylcholine receptor M1	CHRM1
70	MOL000449	Beta-1 adrenergic receptor	ADRB1
71	MOL000449	Sodium channel protein type 5 subunit alpha	SCN5A
72	MOL000449	5-hydroxytryptamine 2A receptor	HTR2A
73	MOL000449	Alpha-1A adrenergic receptor	ADRA1A
74	MOL000449	Gamma-aminobutyric-acid receptor alpha-3 subunit	GABRA3
75	MOL000449	Muscarinic acetylcholine receptor M2	CHRM2
76	MOL000449	Alpha-1B adrenergic receptor	ADRA1B
77	MOL000449	Gamma-aminobutyric acid receptor subunit alpha-1	GABRA1
78	MOL000449	Neuronal acetylcholine receptor protein, alpha-7 chain	CHRNA7
79	MOL006209	Prostaglandin G/H synthase 2	PTGS2
80	MOL006209	Heat shock protein HSP 90	HSP90
81	MOL007449	Progesterone receptor	PGR
82	MOL007449	Nuclear receptor coactivator 2	NCOA2
83	MOL007449	Mineralocorticoid receptor	NR3C2
84	MOL008400	Prostaglandin G/H synthase 1	PTGS1
85	MOL008400	Estrogen receptor	ESR1
86	MOL008400	Androgen receptor	AR
87	MOL008400	Peroxisome proliferator activated receptor gamma	PPARG
88	MOL008400	Prostaglandin G/H synthase 2	PTGS2
89	MOL008400	Retinoic acid receptor RXR-alpha	RXRA
90	MOL008400	CGMP-inhibited 3',5'-cyclic phosphodiesterase A	PDE3A
91	MOL008400	Estrogen receptor beta	ESR2
92	MOL008400	Mitogen-activated protein kinase 14	MAPK14
93	MOL008400	Glycogen synthase kinase-3 beta	GSK3B
94	MOL008400	Heat shock protein HSP 90	HSP90
95	MOL008400	Cell division protein kinase 2	CDK2
96	MOL008400	Serine/threonine-protein kinase Chk1	CHEK1
97	MOL008400	Trypsin-1	PRSS1
98	MOL008400	Proto-oncogene serine/threonine-protein kinase Pim-1	PIM1
99	MOL008400	Cyclin-A2	CCNA2
100	MOL008400	Calmodulin	CaM
101	MOL008400	mRNA of PKA Catalytic Subunit C-alpha	PRKACA
102	MOL008400	Nuclear receptor coactivator 1	NCOA1
103	MOL008400	Nitric oxide synthase, inducible	NOS2
104	MOL008400	Amyloid beta A4 protein	App
105	MOL008400	Collagenase 3	MMP13
106	MOL008400	Neutrophil collagenase	MMP8
107	MOL009618	Progesterone receptor	PGR
108	MOL009618	Mineralocorticoid receptor	NR3C2
109	MOL009621	Progesterone receptor	PGR
110	MOL009622	Progesterone receptor	PGR
111	MOL009622	Mineralocorticoid receptor	NR3C2
112	MOL009622	Nuclear receptor coactivator 2	NCOA2
113	MOL009634	Progesterone receptor	PGR
114	MOL009634	Mineralocorticoid receptor	NR3C2
115	MOL009634	Nuclear receptor coactivator 2	NCOA2
116	MOL009641	Progesterone receptor	PGR
117	MOL009641	Mineralocorticoid receptor	NR3C2
118	MOL009641	Nuclear receptor coactivator 2	NCOA2
119	MOL009642	Progesterone receptor	PGR
120	MOL009644	Progesterone receptor	PGR
121	MOL009644	Mineralocorticoid receptor	NR3C2
122	MOL009644	Glucocorticoid receptor	NR3C1
123	MOL009646	Prostaglandin G/H synthase 2	PTGS2
124	MOL009646	DNA topoisomerase II	TOP2
125	MOL009646	Heat shock protein HSP 90	HSP90
126	MOL009646	Nuclear receptor coactivator 2	NCOA2
127	MOL009646	Calmodulin	CaM
128	MOL009665	DNA topoisomerase II	TOP2
129	MOL009681	Progesterone receptor	PGR
130	MOL009681	Mineralocorticoid receptor	NR3C2
131	MOL009681	Nuclear receptor coactivator 2	NCOA2
132	MOL000098	Prostaglandin G/H synthase 1	PTGS1
133	MOL000098	Androgen receptor	AR
134	MOL000098	Peroxisome proliferator activated receptor gamma	PPARG
135	MOL000098	Prostaglandin G/H synthase 2	PTGS2
136	MOL000098	Heat shock protein HSP 90	HSP90
137	MOL000098	Phosphatidylinositol-4,5-bisphosphate 3-kinase catalytic subunit, gamma isoform	PIK3CG
138	MOL000098	Nuclear receptor coactivator 2	NCOA2
139	MOL000098	Dipeptidyl peptidase IV	DPP4
140	MOL000098	Aldose reductase	AKR1B1
141	MOL000098	Trypsin-1	PRSS1
142	MOL000098	DNA topoisomerase II	TOP2
143	MOL000098	Thrombin	F2
144	MOL000098	Potassium voltage-gated channel subfamily H member 2	KCNH2
145	MOL000098	Sodium channel protein type 5 subunit alpha	SCN5A
146	MOL000098	Coagulation factor Xa	F10
147	MOL000098	Beta-2 adrenergic receptor	ADRB2
148	MOL000098	Stromelysin-1	MMP3
149	MOL000098	mRNA of PKA Catalytic Subunit C-alpha	PRKACA
150	MOL000098	Coagulation factor VII	F7
151	MOL000098	Nitric oxide synthase, endothelial	NOS3
152	MOL000098	DNA topoisomerase II	TOP2
153	MOL000098	Thrombin	F2
154	MOL000098	Potassium voltage-gated channel subfamily H member 2	KCNH2
155	MOL000098	Sodium channel protein type 5 subunit alpha	SCN5A
156	MOL000098	Coagulation factor Xa	F10
157	MOL000098	Beta-2 adrenergic receptor	ADRB2
158	MOL000098	Stromelysin-1	MMP3
159	MOL000098	mRNA of PKA Catalytic Subunit C-alpha	PRKACA
160	MOL000098	Coagulation factor VII	F7
161	MOL000098	Nitric oxide synthase, endothelial	NOS3
162	MOL000098	Bcl-2-like protein 1	BCL2L1
163	MOL000098	Proto-oncogene c-Fos	FOS
164	MOL000098	Cyclin-dependent kinase inhibitor 1	CDKN1A
165	MOL000098	Eukaryotic translation initiation factor 6	EIF6
166	MOL000098	Apoptosis regulator BAX	BAX
167	MOL000098	Caspase-9	CASP9
168	MOL000098	Urokinase-type plasminogen activator	PLAU
169	MOL000098	72 kDa type IV collagenase	MMP2
170	MOL000098	Matrix metalloproteinase-9	MMP9
171	MOL000098	Mitogen-activated protein kinase 1	MAPK1
172	MOL000098	Interleukin-10	IL10
173	MOL000098	Pro-epidermal growth factor	EGF
174	MOL000098	Retinoblastoma-associated protein	RB1
175	MOL000098	Tumor necrosis factor	TNF
176	MOL000098	Transcription factor AP-1	JUN
177	MOL000098	Interleukin-6	IL6
178	MOL000098	Cyclin-dependent kinase inhibitor 2A, isoforms 1/2/3	CDKN2A
179	MOL000098	Activator of 90 kDa heat shock protein ATPase homolog 1	AHSA1
180	MOL000098	Caspase-3	CASP3
181	MOL000098	Cellular tumor antigen p53	TP53
182	MOL000098	ETS domain-containing protein Elk-1	ELK1
183	MOL000098	NF-kappa-B inhibitor alpha	NFKBIA
184	MOL000098	NADPH--cytochrome P450 reductase	POR
185	MOL000098	Ornithine decarboxylase	ODC1
186	MOL000098	Xanthine dehydrogenase/oxidase	XDH
187	MOL000098	Caspase-8	CASP8
188	MOL000098	DNA topoisomerase 1	TOP1
189	MOL000098	RAF proto-oncogene serine/threonine-protein kinase	RAF1
190	MOL000098	Superoxide dismutase [Cu-Zn]	SOD1
191	MOL000098	Protein kinase C alpha type	PRKCA
192	MOL000098	Interstitial collagenase	MMP1
193	MOL000098	Hypoxia-inducible factor 1-alpha	HIF1A
194	MOL000098	Signal transducer and activator of transcription 1-alpha/beta	STAT1
195	MOL000098	Protein CBFA2T1	RUNX1T1
196	MOL000098	Probable E3 ubiquitin-protein ligase HERC5	HERC5
197	MOL000098	Cell division control protein 2 homolog	CRK2
198	MOL000098	78 kDa glucose-regulated protein	GRP78
199	MOL000098	Receptor tyrosine-protein kinase erbB-2	ERBB2
200	MOL000098	Peroxisome proliferator-activated receptor gamma	PPARG
201	MOL000098	Acetyl-CoA carboxylase 1	ACACA
202	MOL000098	Heme oxygenase 1	HMOX1
203	MOL000098	Cytochrome P450 3A4	CYP3A4
204	MOL000098	Cytochrome P450 1A2	CYP1A2
205	MOL000098	Caveolin-1	CAV1
206	MOL000098	Myc proto-oncogene protein	MYC
207	MOL000098	Tissue factor	F3
208	MOL000098	Gap junction alpha-1 protein	GJA1
209	MOL000098	Cytochrome P450 1A1	CYP1A1
210	MOL000098	Intercellular adhesion molecule 1	ICAM1
211	MOL000098	Interleukin-1 beta	IL1B
212	MOL000098	C-C motif chemokine 2	CCL2
213	MOL000098	E-selectin	SELE
214	MOL000098	Vascular cell adhesion protein 1	VCAM1
215	MOL000098	Prostaglandin E2 receptor EP3 subtype	PTGER3
216	MOL000098	Interleukin-8	CXCL8
217	MOL000098	Protein kinase C beta type	PRKCB
218	MOL000098	Baculoviral IAP repeat-containing protein 5	BIRC5
219	MOL000098	Dual oxidase 2	DUOX2
220	MOL000098	Nitric oxide synthase, endothelial	NOS3
221	MOL000098	Heat shock protein beta-1	HSPB1
222	MOL000098	Transforming growth factor beta-1	TGFB1
223	MOL000098	Estrogen sulfotransferase	SULT1E1
224	MOL000098	Maltase-glucoamylase, intestinal	MGAM
225	MOL000098	Interleukin-2	IL2
226	MOL000098	Nuclear receptor subfamily 1 group I member 2	NR1I2
227	MOL000098	Cytochrome P450 1B1	CYP1B1
228	MOL000098	G2/mitotic-specific cyclin-B1	CCNB1
229	MOL000098	Tissue-type plasminogen activator	PLAT
230	MOL000098	Thrombomodulin	THBD
231	MOL000098	Plasminogen activator inhibitor 1	SERPINE1
232	MOL000098	Collagen alpha-1(I) chain	COL1A1
233	MOL000098	Interferon gamma	IFNG
234	MOL000098	Arachidonate 5-lipoxygenase	ALOX5
235	MOL000098	Phosphatidylinositol-3,4,5-trisphosphate 3-phosphatase and dual-specificity protein phosphatase PTEN	PTEN
236	MOL000098	Interleukin-1 alpha	IL1A
237	MOL000098	Myeloperoxidase	MPO
238	MOL000098	DNA topoisomerase 2-alpha	TOP2A
239	MOL000098	Neutrophil cytosol factor 1	NCF1
240	MOL000098	ATP-binding cassette sub-family G member 2	ABCG2
241	MOL000098	Hyaluronan synthase 2	HAS2
242	MOL000098	Glutathione S-transferase P	GSTP1
243	MOL000098	Nuclear factor erythroid 2-related factor 2	NFE2L2
244	MOL000098	NAD(P)H dehydrogenase [quinone] 1	NQO1
245	MOL000098	Poly [ADP-ribose] polymerase 1	PARP1
246	MOL000098	Aryl hydrocarbon receptor	AHR
247	MOL000098	26S proteasome non-ATPase regulatory subunit 3	PSMD3
248	MOL000098	Solute carrier family 2, facilitated glucose transporter member 4	SLC2A4
249	MOL000098	Collagen alpha-1(III) chain	COL3A1
250	MOL000098	DNA gyrase subunit B	gyrB
251	MOL000098	C-X-C motif chemokine 11	CXCL11
252	MOL000098	C-X-C motif chemokine 2	CXCL2
253	MOL000098	DDB1- and CUL4-associated factor 5	DCAF5
254	MOL000098	Nuclear receptor subfamily 1 group I member 3	NR1I3
255	MOL000098	Serine/threonine-protein kinase Chk2	CHEK2
256	MOL000098	Insulin receptor	INSR
257	MOL000098	Claudin-4	CLDN4
258	MOL000098	Peroxisome proliferator-activated receptor alpha	PPARA
259	MOL000098	Peroxisome proliferator activated receptor delta	PPARD
260	MOL000098	Heat shock factor protein 1	HSF1
261	MOL000098	C-reactive protein	CRP
262	MOL000098	C-X-C motif chemokine 10	CXCL10
263	MOL000098	Inhibitor of nuclear factor kappa-B kinase subunit alpha	CHUK
264	MOL000098	Osteopontin	SPP1
265	MOL000098	Runt-related transcription factor 2	RUNX2
266	MOL000098	Ras association domain-containing protein 1	RASSF1
267	MOL000098	Transcription factor E2F1	E2F1
268	MOL000098	Transcription factor E2F2	E2F2
269	MOL000098	Prostatic acid phosphatase	ACPP
270	MOL000098	Cathepsin D	CTSD
271	MOL000098	Insulin-like growth factor-binding protein 3	IGFBP3
272	MOL000098	Insulin-like growth factor II	IGF2
273	MOL000098	CD40 ligand	CD40LG
274	MOL000098	Interferon regulatory factor 1	IRF1
275	MOL000098	Receptor tyrosine-protein kinase erbB-3	ERBB3
276	MOL000098	Serum paraoxonase/arylesterase 1	PON1
277	MOL000098	Type I iodothyronine deiodinase	DIO1
278	MOL000098	Procollagen C-endopeptidase enhancer 1	PCOLCE
279	MOL000098	Puromycin-sensitive aminopeptidase	NPEPPS
280	MOL000098	Hexokinase-2	HK2
281	MOL000098	Homeobox protein Nkx-3.1	NKX3-1
282	MOL000098	Ras GTPase-activating protein 1	RASA1
283	MOL000098	Peroxidase C1A	PRXC1A
284	MOL000098	Glutathione S-transferase Mu 1	GSTM1
285	MOL000098	Glutathione S-transferase Mu 2	GSTM2
286	MOL000392	Nitric oxide synthase, inducible	NOS2
287	MOL000392	Prostaglandin G/H synthase 1	PTGS1
288	MOL000392	Muscarinic acetylcholine receptor M1	CHRM1
289	MOL000392	Estrogen receptor	ESR1
290	MOL000392	Androgen receptor	AR
291	MOL000392	Peroxisome proliferator activated receptor gamma	PPARG
292	MOL000392	Prostaglandin G/H synthase 2	PTGS2
293	MOL000392	Retinoic acid receptor RXR-alpha	RXRA
294	MOL000392	CGMP-inhibited 3',5'-cyclic phosphodiesterase A	PDE3A
295	MOL000392	Alpha-1A adrenergic receptor	ADRA1A
296	MOL000392	Sodium-dependent dopamine transporter	SLC6A3
297	MOL000392	Beta-2 adrenergic receptor	ADRB2
298	MOL000392	Sodium-dependent serotonin transporter	SLC6A4
299	MOL000392	Estrogen receptor beta	ESR2
300	MOL000392	Dipeptidyl peptidase IV	DPP4
301	MOL000392	Mitogen-activated protein kinase 14	MAPK14
302	MOL000392	Glycogen synthase kinase-3 beta	GSK3B
303	MOL000392	Heat shock protein HSP 90	HSP90
304	MOL000392	Cell division protein kinase 2	CDK2
305	MOL000392	Amine oxidase [flavin-containing] B	MAOB
306	MOL000392	Serine/threonine-protein kinase Chk1	CHEK1
307	MOL000392	mRNA of PKA Catalytic Subunit C-alpha	PRKACA
308	MOL000392	Trypsin-1	PRSS1
309	MOL000392	Proto-oncogene serine/threonine-protein kinase Pim-1	PIM1
310	MOL000392	Cyclin-A2	CCNA2
311	MOL000392	Calmodulin	CaM
312	MOL000392	cAMP-dependent protein kinase inhibitor alpha	PKIA
313	MOL000392	Thrombin	F2
314	MOL000392	Nitric oxide synthase, endothelial	NOS3
315	MOL000392	Acetylcholinesterase	ACHE
316	MOL000392	Beta-lactamase	ampC
317	MOL000392	Transcription factor AP-1	JUN
318	MOL000392	Peroxisome proliferator-activated receptor gamma	PPARG
319	MOL000392	Interleukin-4	IL4
320	MOL000392	NAD-dependent deacetylase sirtuin-1	SIRT1
321	MOL000392	ATP synthase subunit beta, mitochondrial	ATP5F1B
322	MOL000392	NADH-ubiquinone oxidoreductase chain 6	ND6
323	MOL000392	3 beta-hydroxysteroid dehydrogenase/Delta 5-->4-isomerase type 2	HSD3B2
324	MOL000392	3 beta-hydroxysteroid dehydrogenase/Delta 5-->4-isomerase type 1	HSD3B1
325	MOL000417	Nitric oxide synthase, inducible	NOS2
326	MOL000417	Prostaglandin G/H synthase 1	PTGS1
327	MOL000417	Estrogen receptor	ESR1
328	MOL000417	Androgen receptor	AR
329	MOL000417	Peroxisome proliferator activated receptor gamma	PPARG
330	MOL000417	Prostaglandin G/H synthase 2	PTGS2
331	MOL000417	Retinoic acid receptor RXR-alpha	RXRA
332	MOL000417	CGMP-inhibited 3',5'-cyclic phosphodiesterase A	PDE3A
333	MOL000417	Estrogen receptor beta	ESR2
334	MOL000417	Dipeptidyl peptidase IV	DPP4
335	MOL000417	Mitogen-activated protein kinase 14	MAPK14
336	MOL000417	Glycogen synthase kinase-3 beta	GSK3B
337	MOL000417	Heat shock protein HSP 90	HSP90
338	MOL000417	Cell division protein kinase 2	CDK2
339	MOL000417	Serine/threonine-protein kinase Chk1	CHEK1
340	MOL000417	mRNA of PKA Catalytic Subunit C-alpha	PRKACA
341	MOL000417	Trypsin-1	PRSS1
342	MOL000417	Proto-oncogene serine/threonine-protein kinase Pim-1	PIM1
343	MOL000417	Cyclin-A2	CCNA2
344	MOL000417	Nuclear receptor coactivator 2	NCOA2
345	MOL000417	Calmodulin	CaM
346	MOL000417	Beta-2 adrenergic receptor	ADRB2
347	MOL000422	Nitric oxide synthase, inducible	NOS2
348	MOL000422	Prostaglandin G/H synthase 1	PTGS1
349	MOL000422	Androgen receptor	AR
350	MOL000422	Peroxisome proliferator activated receptor gamma	PPARG
351	MOL000422	Prostaglandin G/H synthase 2	PTGS2
352	MOL000422	Heat shock protein HSP 90	HSP90
353	MOL000422	Phosphatidylinositol-4,5-bisphosphate 3-kinase catalytic subunit, gamma isoform	PIK3CG
354	MOL000422	mRNA of PKA Catalytic Subunit C-alpha	PRKACA
355	MOL000422	Nuclear receptor coactivator 2	NCOA2
356	MOL000422	Dipeptidyl peptidase IV	DPP4
357	MOL000422	Trypsin-1	PRSS1
358	MOL000422	Progesterone receptor	PGR
359	MOL000422	Thrombin	F2
360	MOL000422	Muscarinic acetylcholine receptor M1	CHRM1
361	MOL000422	Nitric oxide synthase, endothelial	NOS3
362	MOL000422	Gamma-aminobutyric-acid receptor alpha-2 subunit	GABRA2
363	MOL000422	Acetylcholinesterase	ACHE
364	MOL000422	Sodium-dependent noradrenaline transporter	SLC6A2
365	MOL000422	Muscarinic acetylcholine receptor M2	CHRM2
366	MOL000422	Alpha-1B adrenergic receptor	ADRA1B
367	MOL000422	Gamma-aminobutyric acid receptor subunit alpha-1	GABRA1
368	MOL000422	DNA topoisomerase II	TOP2
369	MOL000422	Coagulation factor VII	F7
370	MOL000422	Calmodulin	CaM
371	MOL000422	Transcription factor p65	RELA
372	MOL000422	Inhibitor of nuclear factor kappa-B kinase subunit beta	IKBKB
373	MOL000422	RAC-alpha serine/threonine-protein kinase	AKT1
374	MOL000422	Apoptosis regulator Bcl-2	BCL2
375	MOL000422	Apoptosis regulator BAX	BAX
376	MOL000422	Tumor necrosis factor	TNF
377	MOL000422	Transcription factor AP-1	JUN
378	MOL000422	Activator of 90 kDa heat shock protein ATPase homolog 1	AHSA1
379	MOL000422	Caspase-3	CASP3
380	MOL000422	Mitogen-activated protein kinase 8	MAPK8
381	MOL000422	Xanthine dehydrogenase/oxidase	XDH
382	MOL000422	Interstitial collagenase	MMP1
383	MOL000422	Signal transducer and activator of transcription 1-alpha/beta	STAT1
384	MOL000422	Cell division control protein 2 homolog	CRK2
385	MOL000422	Peroxisome proliferator-activated receptor gamma	PPARG
386	MOL000422	Heme oxygenase 1	HMOX1
387	MOL000422	Cytochrome P450 3A4	CYP3A4
388	MOL000422	Cytochrome P450 1A2	CYP1A2
389	MOL000422	Cytochrome P450 1A1	CYP1A1
390	MOL000422	Intercellular adhesion molecule 1	ICAM1
391	MOL000422	E-selectin	SELE
392	MOL000422	Vascular cell adhesion protein 1	VCAM1
393	MOL000422	Nuclear receptor subfamily 1 group I member 2	NR1I2
394	MOL000422	Cytochrome P450 1B1	CYP1B1
395	MOL000422	Arachidonate 5-lipoxygenase	ALOX5
396	MOL000422	Hyaluronan synthase 2	HAS2
397	MOL000422	Glutathione S-transferase P	GSTP1
398	MOL000422	Aryl hydrocarbon receptor	AHR
399	MOL000422	26S proteasome non-ATPase regulatory subunit 3	PSMD3
400	MOL000422	Solute carrier family 2, facilitated glucose transporter member 4	SLC2A4
401	MOL000422	Nuclear receptor subfamily 1 group I member 3	NR1I3
402	MOL000422	Insulin receptor	INSR
403	MOL000422	Type I iodothyronine deiodinase	DIO1
404	MOL000422	Serine/threonine-protein phosphatase 2B catalytic subunit alpha isoform	PPP3CA
405	MOL000422	Peroxidase C1A	PRXC1A
406	MOL000422	Glutathione S-transferase Mu 1	GSTM1
407	MOL000422	Glutathione S-transferase Mu 2	GSTM2
408	MOL000422	Aldo-keto reductase family 1 member C3	AKR1C3
409	MOL000422	Antileukoproteinase	SLPI
410	MOL004564	Nitric oxide synthase, inducible	NOS2
411	MOL004564	Prostaglandin G/H synthase 1	PTGS1
412	MOL004564	Estrogen receptor	ESR1
413	MOL004564	Androgen receptor	AR
414	MOL004564	Peroxisome proliferator activated receptor gamma	PPARG
415	MOL004564	Prostaglandin G/H synthase 2	PTGS2
416	MOL004564	Dipeptidyl peptidase IV	DPP4
417	MOL004564	Mitogen-activated protein kinase 14	MAPK14
418	MOL004564	Glycogen synthase kinase-3 beta	GSK3B
419	MOL004564	Heat shock protein HSP 90	HSP90
420	MOL004564	Cell division protein kinase 2	CDK2
421	MOL004564	Serine/threonine-protein kinase Chk1	CHEK1
422	MOL004564	mRNA of PKA Catalytic Subunit C-alpha	PRKACA
423	MOL004564	Trypsin-1	PRSS1
424	MOL004564	Calmodulin	CaM
425	MOL004564	Nuclear receptor coactivator 2	NCOA2
426	MOL004564	Phosphatidylinositol-4,5-bisphosphate 3-kinase catalytic subunit, gamma isoform	PIK3CG
427	MOL009289	Thrombin	F2
428	MOL009289	Prostaglandin G/H synthase 2	PTGS2
429	MOL009289	Coagulation factor VII	F7
430	MOL009289	mRNA of Protein-tyrosine phosphatase, non-receptor type 1	PTPN1
431	MOL009289	DNA topoisomerase II	TOP2
432	MOL008628	Prostaglandin G/H synthase 1	PTGS1
433	MOL008628	Dopamine D1 receptor	DRD1
434	MOL008628	Muscarinic acetylcholine receptor M3	CHRM3
435	MOL008628	Muscarinic acetylcholine receptor M1	CHRM1
436	MOL008628	Androgen receptor	AR
437	MOL008628	D(1B) dopamine receptor	DRD5
438	MOL008628	Beta-1 adrenergic receptor	ADRB1
439	MOL008628	Sodium channel protein type 5 subunit alpha	SCN5A
440	MOL008628	Muscarinic acetylcholine receptor M5	CHRM5
441	MOL008628	Prostaglandin G/H synthase 2	PTGS2
442	MOL008628	Alpha-2C adrenergic receptor	ADRA2C
443	MOL008628	D(4) dopamine receptor	DRD4
444	MOL008628	Muscarinic acetylcholine receptor M4	CHRM4
445	MOL008628	Retinoic acid receptor RXR-alpha	RXRA
446	MOL008628	Delta-type opioid receptor	OPRD1
447	MOL008628	CGMP-inhibited 3',5'-cyclic phosphodiesterase A	PDE3A
448	MOL008628	5-hydroxytryptamine 2A receptor	HTR2A
449	MOL008628	Sodium-dependent noradrenaline transporter	SLC6A2
450	MOL008628	Alpha-1A adrenergic receptor	ADRA1A
451	MOL008628	5-hydroxytryptamine 2C receptor	Htr2c
452	MOL008628	Muscarinic acetylcholine receptor M2	CHRM2
453	MOL008628	Alpha-2B adrenergic receptor	ADRA2B
454	MOL008628	Alpha-1B adrenergic receptor	ADRA1B
455	MOL008628	D(3) dopamine receptor	DRD3
456	MOL008628	Sodium-dependent dopamine transporter	SLC6A3
457	MOL008628	Beta-2 adrenergic receptor	ADRB2
458	MOL008628	Alpha-1D adrenergic receptor	ADRA1D
459	MOL008628	Sodium-dependent serotonin transporter	SLC6A4
460	MOL008628	D(2) dopamine receptor	DRD2
461	MOL008628	Mu-type opioid receptor	OPRM1
462	MOL008628	5-hydroxytryptamine 1B receptor	HTR1B
463	MOL008628	Heat shock protein HSP 90	HSP90
464	MOL008628	Calmodulin	CaM
465	MOL004388	Prostaglandin G/H synthase 1	PTGS1
466	MOL004388	Coagulation factor Xa	F10
467	MOL004388	Prostaglandin G/H synthase 2	PTGS2
468	MOL004388	DNA topoisomerase II	TOP2
469	MOL004388	Heat shock protein HSP 90	HSP90
470	MOL004388	Calcium-activated potassium channel subunit alpha 1	KCNMA1
471	MOL004373	Nitric oxide synthase, inducible	NOS2
472	MOL004373	Prostaglandin G/H synthase 1	PTGS1
473	MOL004373	Muscarinic acetylcholine receptor M3	CHRM3
474	MOL004373	Thrombin	F2
475	MOL004373	Potassium voltage-gated channel subfamily H member 2	KCNH2
476	MOL004373	Muscarinic acetylcholine receptor M1	CHRM1
477	MOL004373	Estrogen receptor	ESR1
478	MOL004373	Androgen receptor	AR
479	MOL004373	Sodium channel protein type 5 subunit alpha	SCN5A
480	MOL004373	Peroxisome proliferator activated receptor gamma	PPARG
481	MOL004373	Coagulation factor Xa	F10
482	MOL004373	Muscarinic acetylcholine receptor M5	CHRM5
483	MOL004373	Prostaglandin G/H synthase 2	PTGS2
484	MOL004373	Nitric oxide synthase, endothelial	NOS3
485	MOL004373	Retinoic acid receptor RXR-alpha	RXRA
486	MOL004373	Acetylcholinesterase	ACHE
487	MOL004373	Alpha-1B adrenergic receptor	ADRA1B
488	MOL004373	Beta-2 adrenergic receptor	ADRB2
489	MOL004373	Estrogen receptor beta	ESR2
490	MOL004373	Dipeptidyl peptidase IV	DPP4
491	MOL004373	Mitogen-activated protein kinase 14	MAPK14
492	MOL004373	Glycogen synthase kinase-3 beta	GSK3B
493	MOL004373	Heat shock protein HSP 90	HSP90
494	MOL004373	Cell division protein kinase 2	CDK2
495	MOL004373	Serine/threonine-protein kinase Chk1	CHEK1
496	MOL004373	Retinoic acid receptor RXR-beta	RXRB
497	MOL004373	Trypsin-1	PRSS1
498	MOL004373	Proto-oncogene serine/threonine-protein kinase Pim-1	PIM1
499	MOL004373	Nuclear receptor coactivator 2	NCOA2
500	MOL004373	Calmodulin	CaM
501	MOL004373	Coagulation factor VII	F7
502	MOL004373	Vascular endothelial growth factor receptor 2	KDR
503	MOL004373	DNA topoisomerase II	TOP2
504	MOL004373	Cyclin-A2	CCNA2
505	MOL004373	Nuclear receptor coactivator 1	NCOA1
506	MOL004373	Calcium-activated potassium channel subunit alpha 1	KCNMA1
507	MOL004373	Ig gamma-1 chain C region	IGHG1
508	MOL004382	Estrogen receptor	ESR1
509	MOL004382	Androgen receptor	AR
510	MOL004382	Coagulation factor Xa	F10
511	MOL004382	Prostaglandin G/H synthase 2	PTGS2
512	MOL004382	DNA topoisomerase II	TOP2
513	MOL004382	Trypsin-1	PRSS1
514	MOL004382	Proto-oncogene serine/threonine-protein kinase Pim-1	PIM1
515	MOL004382	Nuclear receptor coactivator 2	NCOA2
516	MOL004382	Calmodulin	CaM
517	MOL004384	Nitric oxide synthase, inducible	NOS2
518	MOL004384	Androgen receptor	AR
519	MOL004384	Coagulation factor Xa	F10
520	MOL004384	Prostaglandin G/H synthase 2	PTGS2
521	MOL004384	Acetylcholinesterase	ACHE
522	MOL004384	Estrogen receptor beta	ESR2
523	MOL004384	Dipeptidyl peptidase IV	DPP4
524	MOL004384	Cell division protein kinase 2	CDK2
525	MOL004384	Trypsin-1	PRSS1
526	MOL004384	Nuclear receptor coactivator 2	NCOA2
527	MOL004384	Calmodulin	CaM
528	MOL004386	Nitric oxide synthase, inducible	NOS2
529	MOL004386	Androgen receptor	AR
530	MOL004386	Coagulation factor Xa	F10
531	MOL004386	Prostaglandin G/H synthase 2	PTGS2
532	MOL004386	Acetylcholinesterase	ACHE
533	MOL004386	DNA topoisomerase II	TOP2
534	MOL004386	Dipeptidyl peptidase IV	DPP4
535	MOL004386	mRNA of PKA Catalytic Subunit C-alpha	PRKACA
536	MOL004386	Trypsin-1	PRSS1
537	MOL004386	Nuclear receptor coactivator 2	NCOA2
538	MOL004386	Calmodulin	CaM
539	MOL004367	Prostaglandin G/H synthase 2	PTGS2
540	MOL004367	Heat shock protein HSP 90	HSP90
541	MOL004367	Nuclear receptor coactivator 2	NCOA2
542	MOL004367	Calmodulin	CaM
543	MOL004391	Nitric oxide synthase, inducible	NOS2
544	MOL004391	Prostaglandin G/H synthase 1	PTGS1
545	MOL004391	Muscarinic acetylcholine receptor M3	CHRM3
546	MOL004391	Thrombin	F2
547	MOL004391	Muscarinic acetylcholine receptor M1	CHRM1
548	MOL004391	Estrogen receptor	ESR1
549	MOL004391	Androgen receptor	AR
550	MOL004391	Beta-1 adrenergic receptor	ADRB1
551	MOL004391	Sodium channel protein type 5 subunit alpha	SCN5A
552	MOL004391	Peroxisome proliferator activated receptor gamma	PPARG
553	MOL004391	Prostaglandin G/H synthase 2	PTGS2
554	MOL004391	Nitric oxide synthase, endothelial	NOS3
555	MOL004391	Retinoic acid receptor RXR-alpha	RXRA
556	MOL004391	Acetylcholinesterase	ACHE
557	MOL004391	CGMP-inhibited 3',5'-cyclic phosphodiesterase A	PDE3A
558	MOL004391	Alpha-1B adrenergic receptor	ADRA1B
559	MOL004391	Sodium-dependent dopamine transporter	SLC6A3
560	MOL004391	Beta-2 adrenergic receptor	ADRB2
561	MOL004391	Alpha-1D adrenergic receptor	ADRA1D
562	MOL004391	Sodium-dependent serotonin transporter	SLC6A4
563	MOL004391	Estrogen receptor beta	ESR2
564	MOL004391	Gamma-aminobutyric acid receptor subunit alpha-1	GABRA1
565	MOL004391	Dipeptidyl peptidase IV	DPP4
566	MOL004391	Mitogen-activated protein kinase 14	MAPK14
567	MOL004391	Glycogen synthase kinase-3 beta	GSK3B
568	MOL004391	Heat shock protein HSP 90	HSP90
569	MOL004391	Cell division protein kinase 2	CDK2
570	MOL004391	Serine/threonine-protein kinase Chk1	CHEK1
571	MOL004391	Proto-oncogene serine/threonine-protein kinase Pim-1	PIM1
572	MOL004391	Cyclin-A2	CCNA2
573	MOL004394	DNA topoisomerase II	TOP2
574	MOL004396	Estrogen receptor	ESR1
575	MOL004396	Sodium channel protein type 5 subunit alpha	SCN5A
576	MOL004396	Prostaglandin G/H synthase 2	PTGS2
577	MOL004396	Alpha-1B adrenergic receptor	ADRA1B
578	MOL004396	Beta-2 adrenergic receptor	ADRB2
579	MOL004396	Heat shock protein HSP 90	HSP90
580	MOL004396	Cell division protein kinase 2	CDK2
581	MOL004396	Proto-oncogene serine/threonine-protein kinase Pim-1	PIM1
582	MOL004396	Cyclin-A2	CCNA2
583	MOL004396	Nuclear receptor coactivator 2	NCOA2
584	MOL004396	Calmodulin	CaM
585	MOL004425	DNA topoisomerase II	TOP2
586	MOL001002	Cell division protein kinase 2	CDK2
587	MOL001002	Estrogen receptor	ESR1
588	MOL001002	Androgen receptor	AR
589	MOL001002	Progesterone receptor	PGR
590	MOL001002	Heat shock protein HSP 90	HSP90
591	MOL001002	Transcription factor p65	RELA
592	MOL001002	Vascular endothelial growth factor A	VEGFA
593	MOL001002	Cyclin-dependent kinase inhibitor 1	CDKN1A
594	MOL001002	72 kDa type IV collagenase	MMP2
595	MOL001002	Matrix metalloproteinase-9	MMP9
596	MOL001002	NF-kappa-B inhibitor alpha	NFKBIA
597	MOL001002	Interleukin-8	CXCL8
598	MOL001002	Protein kinase C beta type	PRKCB
599	MOL001002	Glutathione S-transferase P	GSTP1
600	MOL001002	Insulin-like growth factor II	IGF2
601	MOL001002	Glutathione S-transferase Mu 1	GSTM1
602	MOL001002	Glutathione S-transferase Mu 2	GSTM2
603	MOL001002	Glutathione S-transferase A1	GSTA1
604	MOL001002	Glutathione S-transferase A2	GSTA2
605	MOL001002	Chitin synthase 2	CHS2
606	MOL002959	Nitric oxide synthase, inducible	NOS2
607	MOL002959	Prostaglandin G/H synthase 1	PTGS1
608	MOL002959	Estrogen receptor	ESR1
609	MOL002959	Androgen receptor	AR
610	MOL002959	Peroxisome proliferator activated receptor gamma	PPARG
611	MOL002959	Prostaglandin G/H synthase 2	PTGS2
612	MOL002959	Retinoic acid receptor RXR-alpha	RXRA
613	MOL002959	Estrogen receptor beta	ESR2
614	MOL002959	Mitogen-activated protein kinase 14	MAPK14
615	MOL002959	Glycogen synthase kinase-3 beta	GSK3B
616	MOL002959	Heat shock protein HSP 90	HSP90
617	MOL002959	Cell division protein kinase 2	CDK2
618	MOL002959	Serine/threonine-protein kinase Chk1	CHEK1
619	MOL002959	mRNA of PKA Catalytic Subunit C-alpha	PRKACA
620	MOL002959	Trypsin-1	PRSS1
621	MOL002959	Proto-oncogene serine/threonine-protein kinase Pim-1	PIM1
622	MOL002959	Cyclin-A2	CCNA2
623	MOL002959	Nuclear receptor coactivator 1	NCOA1
624	MOL002959	Calmodulin	CaM
625	MOL000546	Progesterone receptor	PGR
626	MOL000546	Mineralocorticoid receptor	NR3C2
627	MOL000546	Transcription factor p65	RELA
628	MOL000546	RAC-alpha serine/threonine-protein kinase	AKT1
629	MOL000546	Vascular endothelial growth factor A	VEGFA
630	MOL000546	Cyclin-dependent kinase inhibitor 1	CDKN1A
631	MOL000546	Cellular tumor antigen p53	TP53
632	MOL000546	Prostaglandin G/H synthase 2	PTGS2
633	MOL000546	Fatty acid synthase	FASN
634	MOL000546	Superoxide dismutase [Cu-Zn]	SOD1
635	MOL000546	Catalase	CAT
636	MOL000546	Hypoxia-inducible factor 1-alpha	HIF1A
637	MOL000546	Nuclear receptor subfamily 1 group I member 2	NR1I2
638	MOL000546	Cytosolic phospholipase A2	PLA2G4A
639	MOL000546	Canalicular multispecific organic anion transporter 1	ABCC2
640	MOL000546	Serine/threonine-protein kinase mTOR	MTOR
641	MOL009763	DNA topoisomerase II	TOP2
642	MOL004114	Estrogen receptor	ESR1
643	MOL004114	Androgen receptor	AR
644	MOL004114	Peroxisome proliferator activated receptor gamma	PPARG
645	MOL004114	Prostaglandin G/H synthase 2	PTGS2
646	MOL004114	Carbonic anhydrase II	CA2
647	MOL004114	Estrogen receptor beta	ESR2
648	MOL004114	Mitogen-activated protein kinase 14	MAPK14
649	MOL004114	Heat shock protein HSP 90	HSP90
650	MOL004114	Cell division protein kinase 2	CDK2
651	MOL004114	Serine/threonine-protein kinase Chk1	CHEK1
652	MOL004114	Cyclin-A2	CCNA2
653	MOL001558	Coagulation factor Xa	F10
654	MOL001558	Prostaglandin G/H synthase 2	PTGS2
655	MOL001558	Sodium channel protein type 5 subunit alpha	SCN5A
656	MOL001558	G1/S-specific cyclin-D1	CCND1
657	MOL001558	Interleukin-10	IL10
658	MOL001558	Fatty acid synthase	FASN
659	MOL001558	Acetyl-CoA carboxylase 1	ACACA
660	MOL001558	Glucose-6-phosphate 1-dehydrogenase	G6PD
661	MOL001558	Nitric oxide synthase, endothelial	NOS3
662	MOL001558	Endothelin-converting enzyme 1	ECE1
663	MOL001558	Medium-chain specific acyl-CoA dehydrogenase, mitochondrial	ACADM
664	MOL001558	Cytochrome P450 2B6	CYP2B6
665	MOL001558	UDP-glucuronosyltransferase 1-1	UGT1A1
666	MOL001558	Sterol regulatory element-binding protein 1	SREBF1
667	MOL001558	NADPH oxidase 3	NOX3
668	MOL001558	NADPH oxidase 1	NOX1
669	MOL001558	Peroxisomal acyl-coenzyme A oxidase 1	ACOX1
670	MOL001558	ATP-citrate synthase	ACLY
671	MOL001558	Peroxisomal bifunctional enzyme	EHHADH
672	MOL001558	Methylglutaconyl-CoA hydratase, mitochondrial	AUH
673	MOL001558	Trifunctional enzyme subunit beta, mitochondrial	HADHB
674	MOL001558	2,4-dienoyl-CoA reductase, mitochondrial	DECR1
675	MOL001558	3,2-trans-enoyl-CoA isomerase, mitochondrial	ECI1
676	MOL000354	Nitric oxide synthase, inducible	NOS2
677	MOL000354	Prostaglandin G/H synthase 1	PTGS1
678	MOL000354	Estrogen receptor	ESR1
679	MOL000354	Androgen receptor	AR
680	MOL000354	Peroxisome proliferator activated receptor gamma	PPARG
681	MOL000354	Prostaglandin G/H synthase 2	PTGS2
682	MOL000354	mRNA of Protein-tyrosine phosphatase, non-receptor type 1	PTPN1
683	MOL000354	Estrogen receptor beta	ESR2
684	MOL000354	Dipeptidyl peptidase IV	DPP4
685	MOL000354	Mitogen-activated protein kinase 14	MAPK14
686	MOL000354	Glycogen synthase kinase-3 beta	GSK3B
687	MOL000354	Heat shock protein HSP 90	HSP90
688	MOL000354	Cell division protein kinase 2	CDK2
689	MOL000354	Phosphatidylinositol-4,5-bisphosphate 3-kinase catalytic subunit, gamma isoform	PIK3CG
690	MOL000354	mRNA of PKA Catalytic Subunit C-alpha	PRKACA
691	MOL000354	Trypsin-1	PRSS1
692	MOL000354	Proto-oncogene serine/threonine-protein kinase Pim-1	PIM1
693	MOL000354	Cyclin-A2	CCNA2
694	MOL000354	Nuclear receptor coactivator 2	NCOA2
695	MOL000354	Calmodulin	CaM
696	MOL000354	Glycogen phosphorylase, muscle form	PYGM
697	MOL000354	Peroxisome proliferator activated receptor delta	PPARD
698	MOL000354	Serine/threonine-protein kinase Chk1	CHEK1
699	MOL000354	Aldose reductase	AKR1B1
700	MOL000354	Nuclear receptor coactivator 1	NCOA1
701	MOL000354	Coagulation factor VII	F7
702	MOL000354	Thrombin	F2
703	MOL000354	Nitric oxide synthase, endothelial	NOS3
704	MOL000354	Acetylcholinesterase	ACHE
705	MOL000354	Gamma-aminobutyric acid receptor subunit alpha-1	GABRA1
706	MOL000354	Amine oxidase [flavin-containing] B	MAOB
707	MOL000354	Glutamate receptor 2	GRIA2
708	MOL000354	Cytochrome P450-cam	CYP101A
709	MOL000354	Transcription factor p65	RELA
710	MOL000354	Xanthine dehydrogenase/oxidase	XDH
711	MOL000354	Neutrophil cytosol factor 1	NCF1
712	MOL000354	Oxidized low-density lipoprotein receptor 1	OLR1
713	MOL005440	Progesterone receptor	PGR
714	MOL005440	Mineralocorticoid receptor	NR3C2
715	MOL005440	4-aminobutyrate aminotransferase, mitochondrial	ABAT
716	MOL005440	Gamma-aminobutyric acid receptor subunit alpha-1	GABRA1
717	MOL005440	Alcohol dehydrogenase 1B	ADH1B
718	MOL005440	Alcohol dehydrogenase 1C	ADH1C
719	MOL005440	Alcohol dehydrogenase 1A	ADH1A
720	MOL005440	Cytochrome P450-cam	CYP101A
721	MOL005440	Lysozyme	LYZ
722	MOL005440	Bacillolysin	npr
723	MOL005440	Nicotinate-nucleotide--dimethylbenzimidazole phosphoribosyltransferase	cobT
724	MOL005440	Nuclear receptor coactivator 2	NCOA2
725	MOL005944	Transcription factor p65	RELA
726	MOL005944	72 kDa type IV collagenase	MMP2
727	MOL005944	Tumor necrosis factor	TNF
728	MOL005944	Interleukin-6	IL6
729	MOL005944	Caspase-3	CASP3
730	MOL005944	Myc proto-oncogene protein	MYC
731	MOL005944	Intercellular adhesion molecule 1	ICAM1
732	MOL005944	Heparanase	HPSE
733	MOL005944	Immediate early response 3-interacting protein 1	IER3IP1
734	MOL005944	CD44 antigen	CD44
735	MOL002879	Sodium channel protein type 5 subunit alpha	SCN5A
736	MOL002879	Beta-2 adrenergic receptor	ADRB2
737	MOL002879	Muscarinic acetylcholine receptor M3	CHRM3
738	MOL003648	Prostaglandin G/H synthase 1	PTGS1
739	MOL003648	Muscarinic acetylcholine receptor M3	CHRM3
740	MOL003648	Sodium channel protein type 5 subunit alpha	SCN5A
741	MOL003648	Prostaglandin G/H synthase 2	PTGS2
742	MOL003648	5-hydroxytryptamine receptor 3A	HTR3A
743	MOL003648	Retinoic acid receptor RXR-alpha	RXRA
744	MOL003648	Alpha-1B adrenergic receptor	ADRA1B
745	MOL003648	Beta-2 adrenergic receptor	ADRB2
746	MOL003648	Alpha-1D adrenergic receptor	ADRA1D
747	MOL003648	Sodium-dependent serotonin transporter	SLC6A4
748	MOL003648	Heat shock protein HSP 90	HSP90
749	MOL003648	Phosphatidylinositol-4,5-bisphosphate 3-kinase catalytic subunit, gamma isoform	PIK3CG
750	MOL003648	Neuronal acetylcholine receptor protein, alpha-7 chain	CHRNA7
751	MOL003648	mRNA of PKA Catalytic Subunit C-alpha	PRKACA
752	MOL003648	Ig gamma-1 chain C region	IGHG1
753	MOL003648	Trypsin-1	PRSS1
754	MOL003648	Nuclear receptor coactivator 1	NCOA1
755	MOL003648	Calmodulin	CaM
756	MOL005308	Muscarinic acetylcholine receptor M3	CHRM3
757	MOL005308	Muscarinic acetylcholine receptor M1	CHRM1
758	MOL005308	Sodium-dependent noradrenaline transporter	SLC6A2
759	MOL005308	Sodium-dependent dopamine transporter	SLC6A3
760	MOL005308	Beta-2 adrenergic receptor	ADRB2
761	MOL005308	Sodium-dependent serotonin transporter	SLC6A4
762	MOL005308	Gamma-aminobutyric acid receptor subunit alpha-1	GABRA1
763	MOL005308	Dipeptidyl peptidase IV	DPP4
764	MOL005320	Prostaglandin G/H synthase 1	PTGS1
765	MOL005320	Prostaglandin G/H synthase 2	PTGS2
766	MOL005320	Retinoic acid receptor RXR-gamma	RXRG
767	MOL005320	Nuclear receptor coactivator 2	NCOA2
768	MOL005321	Prostaglandin G/H synthase 1	PTGS1
769	MOL005321	Thrombin	F2
770	MOL005321	Androgen receptor	AR
771	MOL005321	Sodium channel protein type 5 subunit alpha	SCN5A
772	MOL005321	Peroxisome proliferator activated receptor gamma	PPARG
773	MOL005321	Prostaglandin G/H synthase 2	PTGS2
774	MOL005321	Retinoic acid receptor RXR-alpha	RXRA
775	MOL005321	CGMP-inhibited 3',5'-cyclic phosphodiesterase A	PDE3A
776	MOL005321	Beta-2 adrenergic receptor	ADRB2
777	MOL005321	Gamma-aminobutyric acid receptor subunit alpha-1	GABRA1
778	MOL005321	Dipeptidyl peptidase IV	DPP4
779	MOL005321	Heat shock protein HSP 90	HSP90
780	MOL005321	Phosphatidylinositol-4,5-bisphosphate 3-kinase catalytic subunit, gamma isoform	PIK3CG
781	MOL005321	Neuronal acetylcholine receptor protein, alpha-7 chain	CHRNA7
782	MOL005321	mRNA of PKA Catalytic Subunit C-alpha	PRKACA
783	MOL005321	Acetylcholinesterase	ACHE
784	MOL005356	Prostaglandin G/H synthase 1	PTGS1
785	MOL005356	Sodium channel protein type 5 subunit alpha	SCN5A
786	MOL005356	Prostaglandin G/H synthase 2	PTGS2
787	MOL005356	Retinoic acid receptor RXR-alpha	RXRA
788	MOL005356	Beta-2 adrenergic receptor	ADRB2
789	MOL005356	Gamma-aminobutyric acid receptor subunit alpha-1	GABRA1
790	MOL005356	Phosphatidylinositol-4,5-bisphosphate 3-kinase catalytic subunit, gamma isoform	PIK3CG
791	MOL005356	Neuronal acetylcholine receptor protein, alpha-7 chain	CHRNA7
792	MOL005356	mRNA of PKA Catalytic Subunit C-alpha	PRKACA
793	MOL005356	Nuclear receptor coactivator 2	NCOA2
794	MOL005384	Potassium voltage-gated channel subfamily H member 2	KCNH2
795	MOL005384	Sodium channel protein type 5 subunit alpha	SCN5A
796	MOL005384	Coagulation factor Xa	F10
797	MOL005384	Prostaglandin G/H synthase 2	PTGS2
798	MOL005384	Coagulation factor VII	F7
799	MOL005384	mRNA of Protein-tyrosine phosphatase, non-receptor type 1	PTPN1
800	MOL005384	Beta-2 adrenergic receptor	ADRB2
801	MOL005384	Heat shock protein HSP 90	HSP90
802	MOL005384	Nuclear receptor coactivator 1	NCOA1
803	MOL005384	Calcium-activated potassium channel subunit alpha 1	KCNMA1
804	MOL005384	Calmodulin	CaM
805	MOL005384	Prostaglandin G/H synthase 1	PTGS1
806	MOL005384	Retinoic acid receptor RXR-alpha	RXRA
807	MOL005384	CGMP-inhibited 3',5'-cyclic phosphodiesterase A	PDE3A
808	MOL005384	Alpha-1D adrenergic receptor	ADRA1D
809	MOL005384	mRNA of PKA Catalytic Subunit C-alpha	PRKACA
810	MOL000787	Prostaglandin G/H synthase 1	PTGS1
811	MOL000787	Muscarinic acetylcholine receptor M3	CHRM3
812	MOL000787	Potassium voltage-gated channel subfamily H member 2	KCNH2
813	MOL000787	Muscarinic acetylcholine receptor M1	CHRM1
814	MOL000787	Sodium channel protein type 5 subunit alpha	SCN5A
815	MOL000787	Coagulation factor Xa	F10
816	MOL000787	Muscarinic acetylcholine receptor M5	CHRM5
817	MOL000787	Prostaglandin G/H synthase 2	PTGS2
818	MOL000787	5-hydroxytryptamine receptor 3A	HTR3A
819	MOL000787	Coagulation factor VII	F7
820	MOL000787	Muscarinic acetylcholine receptor M4	CHRM4
821	MOL000787	Delta-type opioid receptor	OPRD1
822	MOL000787	5-hydroxytryptamine 2A receptor	HTR2A
823	MOL000787	Alpha-1B adrenergic receptor	ADRA1B
824	MOL000787	Beta-2 adrenergic receptor	ADRB2
825	MOL000787	Alpha-1D adrenergic receptor	ADRA1D
826	MOL000787	Mu-type opioid receptor	OPRM1
827	MOL000787	Heat shock protein HSP 90	HSP90
828	MOL000787	mRNA of PKA Catalytic Subunit C-alpha	PRKACA
829	MOL000787	Calmodulin	CaM
830	MOL000787	Sodium-dependent serotonin transporter	SLC6A4
831	MOL000787	Voltage-dependent L-type calcium channel subunit alpha-1S	CACNA1S
832	MOL000787	CGMP-inhibited 3',5'-cyclic phosphodiesterase A	PDE3A
833	MOL000787	Sodium-dependent dopamine transporter	SLC6A3
834	MOL000787	Type IV phosphodiesterase	PDE4
835	MOL000787	DNA topoisomerase II	TOP2
836	MOL000787	Dopamine D1 receptor	DRD1
837	MOL000787	Vascular endothelial growth factor receptor 2	KDR
838	MOL010921	Dopamine D1 receptor	DRD1
839	MOL010921	Muscarinic acetylcholine receptor M3	CHRM3
840	MOL010921	Thrombin	F2
841	MOL010921	Muscarinic acetylcholine receptor M1	CHRM1
842	MOL010921	Muscarinic acetylcholine receptor M5	CHRM5
843	MOL010921	Prostaglandin G/H synthase 2	PTGS2
844	MOL010921	Carbonic anhydrase II	CA2
845	MOL010921	Muscarinic acetylcholine receptor M4	CHRM4
846	MOL010921	Retinoic acid receptor RXR-alpha	RXRA
847	MOL010921	Delta-type opioid receptor	OPRD1
848	MOL010921	Acetylcholinesterase	ACHE
849	MOL010921	CGMP-inhibited 3',5'-cyclic phosphodiesterase A	PDE3A
850	MOL010921	5-hydroxytryptamine 2A receptor	HTR2A
851	MOL010921	Sodium-dependent noradrenaline transporter	SLC6A2
852	MOL010921	Alpha-1A adrenergic receptor	ADRA1A
853	MOL010921	5-hydroxytryptamine 2C receptor	Htr2c
854	MOL010921	Progesterone receptor	PGR
855	MOL010921	Muscarinic acetylcholine receptor M2	CHRM2
856	MOL010921	Kappa-type opioid receptor	OPRK1
857	MOL010921	Sodium-dependent dopamine transporter	SLC6A3
858	MOL010921	Beta-2 adrenergic receptor	ADRB2
859	MOL010921	Alpha-1D adrenergic receptor	ADRA1D
860	MOL010921	Sodium-dependent serotonin transporter	SLC6A4
861	MOL010921	D(2) dopamine receptor	DRD2
862	MOL010921	Mu-type opioid receptor	OPRM1
863	MOL000448	Nitric oxide synthase, inducible	NOS2
864	MOL000448	Prostaglandin G/H synthase 1	PTGS1
865	MOL000448	Estrogen receptor	ESR1
866	MOL000448	Sodium channel protein type 5 subunit alpha	SCN5A
867	MOL000448	Coagulation factor Xa	F10
868	MOL000448	Prostaglandin G/H synthase 2	PTGS2
869	MOL000448	Beta-2 adrenergic receptor	ADRB2
870	MOL000448	Estrogen receptor beta	ESR2
871	MOL000448	Heat shock protein HSP 90	HSP90
872	MOL000448	Calmodulin	CaM
873	MOL001645	Prostaglandin G/H synthase 1	PTGS1
874	MOL001645	Prostaglandin G/H synthase 2	PTGS2
875	MOL001645	Nuclear receptor coactivator 2	NCOA2
876	MOL001645	Retinoic acid receptor RXR-alpha	RXRA
877	MOL000358	Progesterone receptor	PGR
878	MOL000358	Nuclear receptor coactivator 2	NCOA2
879	MOL000358	Prostaglandin G/H synthase 1	PTGS1
880	MOL000358	Prostaglandin G/H synthase 2	PTGS2
881	MOL000358	Heat shock protein HSP 90	HSP90
882	MOL000358	Phosphatidylinositol-4,5-bisphosphate 3-kinase catalytic subunit, gamma isoform	PIK3CG
883	MOL000358	Potassium voltage-gated channel subfamily H member 2	KCNH2
884	MOL000358	mRNA of PKA Catalytic Subunit C-alpha	PRKACA
885	MOL000358	Dopamine D1 receptor	DRD1
886	MOL000358	Muscarinic acetylcholine receptor M3	CHRM3
887	MOL000358	Muscarinic acetylcholine receptor M1	CHRM1
888	MOL000358	Sodium channel protein type 5 subunit alpha	SCN5A
889	MOL000358	Gamma-aminobutyric-acid receptor alpha-2 subunit	GABRA2
890	MOL000358	Muscarinic acetylcholine receptor M4	CHRM4
891	MOL000358	CGMP-inhibited 3',5'-cyclic phosphodiesterase A	PDE3A
892	MOL000358	5-hydroxytryptamine 2A receptor	HTR2A
893	MOL000358	Gamma-aminobutyric-acid receptor alpha-5 subunit	GABRA5
894	MOL000358	Alpha-1A adrenergic receptor	ADRA1A
895	MOL000358	Gamma-aminobutyric-acid receptor alpha-3 subunit	GABRA3
896	MOL000358	Muscarinic acetylcholine receptor M2	CHRM2
897	MOL000358	Alpha-1B adrenergic receptor	ADRA1B
898	MOL000358	Beta-2 adrenergic receptor	ADRB2
899	MOL000358	Neuronal acetylcholine receptor subunit alpha-2	CHRNA2
900	MOL000358	Sodium-dependent serotonin transporter	SLC6A4
901	MOL000358	Mu-type opioid receptor	OPRM1
902	MOL000358	Gamma-aminobutyric acid receptor subunit alpha-1	GABRA1
903	MOL000358	Neuronal acetylcholine receptor protein, alpha-7 chain	CHRNA7
904	MOL000358	Cytochrome P450-cam	CYP101A
905	MOL000358	Apoptosis regulator Bcl-2	BCL2
906	MOL000358	Apoptosis regulator BAX	BAX
907	MOL000358	Caspase-9	CASP9
908	MOL000358	Transcription factor AP-1	JUN
909	MOL000358	Caspase-3	CASP3
910	MOL000358	Caspase-8	CASP8
911	MOL000358	Protein kinase C alpha type	PRKCA
912	MOL000358	Transforming growth factor beta-1	TGFB1
913	MOL000358	Serum paraoxonase/arylesterase 1	PON1
914	MOL000358	Microtubule-associated protein 2	MAP2
915	MOL000953	Progesterone receptor	PGR
916	MOL000953	Mineralocorticoid receptor	NR3C2
917	MOL000953	Cytochrome P450-cam	CYP101A
918	MOL000953	Nuclear receptor coactivator 2	NCOA2
919	MOL003578	Mineralocorticoid receptor	NR3C2
920	MOL001494	Prostaglandin G/H synthase 1	PTGS1
921	MOL001494	Prostaglandin G/H synthase 2	PTGS2
922	MOL001494	Nuclear receptor coactivator 2	NCOA2
923	MOL001495	Prostaglandin G/H synthase 1	PTGS1
924	MOL001495	Nuclear receptor coactivator 2	NCOA2
925	MOL005406	Dopamine D1 receptor	DRD1
926	MOL005406	Muscarinic acetylcholine receptor M3	CHRM3
927	MOL005406	Muscarinic acetylcholine receptor M1	CHRM1
928	MOL005406	Beta-1 adrenergic receptor	ADRB1
929	MOL005406	Muscarinic acetylcholine receptor M5	CHRM5
930	MOL005406	Alpha-2A adrenergic receptor	ADRA2A
931	MOL005406	Alpha-2C adrenergic receptor	ADRA2C
932	MOL005406	Muscarinic acetylcholine receptor M4	CHRM4
933	MOL005406	Delta-type opioid receptor	OPRD1
934	MOL005406	5-hydroxytryptamine 2A receptor	HTR2A
935	MOL005406	Sodium-dependent noradrenaline transporter	SLC6A2
936	MOL005406	Alpha-1A adrenergic receptor	ADRA1A
937	MOL005406	5-hydroxytryptamine 2C receptor	Htr2c
938	MOL005406	Muscarinic acetylcholine receptor M2	CHRM2
939	MOL005406	Alpha-2B adrenergic receptor	ADRA2B
940	MOL005406	Alpha-1B adrenergic receptor	ADRA1B
941	MOL005406	Sodium-dependent dopamine transporter	SLC6A3
942	MOL005406	Beta-2 adrenergic receptor	ADRB2
943	MOL005406	Sodium-dependent serotonin transporter	SLC6A4
944	MOL005406	D(2) dopamine receptor	DRD2
945	MOL005406	Mu-type opioid receptor	OPRM1
946	MOL005406	Gamma-aminobutyric acid receptor subunit alpha-1	GABRA1
947	MOL005406	5-hydroxytryptamine 1B receptor	HTR1B
948	MOL005406	Histamine H1 receptor	HRH1
949	MOL005406	5-hydroxytryptamine 1A receptor	HTR1A
950	MOL005438	Progesterone receptor	PGR
951	MOL008173	Progesterone receptor	PGR
952	MOL008173	Nuclear receptor coactivator 2	NCOA2
953	MOL009604	Prostaglandin G/H synthase 2	PTGS2
954	MOL009604	Progesterone receptor	PGR
955	MOL009604	Nuclear receptor coactivator 2	NCOA2
956	MOL009617	Progesterone receptor	PGR
957	MOL009620	Progesterone receptor	PGR
958	MOL009635	Progesterone receptor	PGR
959	MOL009639	Progesterone receptor	PGR
960	MOL009640	Progesterone receptor	PGR
961	MOL009656	Nuclear receptor coactivator 2	NCOA2
962	MOL009677	Progesterone receptor	PGR
963	MOL009677	Mineralocorticoid receptor	NR3C2
964	MOL009678	Progesterone receptor	PGR
965	MOL009678	Mineralocorticoid receptor	NR3C2
966	MOL000184	Progesterone receptor	PGR
967	MOL009278	Nitric oxide synthase, inducible	NOS2
968	MOL009278	Estrogen receptor	ESR1
969	MOL009278	Androgen receptor	AR
970	MOL009278	Peroxisome proliferator activated receptor gamma	PPARG
971	MOL009278	Prostaglandin G/H synthase 2	PTGS2
972	MOL009278	Estrogen receptor beta	ESR2
973	MOL009278	Dipeptidyl peptidase IV	DPP4
974	MOL009278	Mitogen-activated protein kinase 14	MAPK14
975	MOL009278	Glycogen synthase kinase-3 beta	GSK3B
976	MOL009278	Heat shock protein HSP 90	HSP90
977	MOL009278	Cell division protein kinase 2	CDK2
978	MOL009278	Trypsin-1	PRSS1
979	MOL009278	Proto-oncogene serine/threonine-protein kinase Pim-1	PIM1
980	MOL009278	Cyclin-A2	CCNA2
981	MOL009278	Calmodulin	CaM
982	MOL009278	Prostaglandin G/H synthase 1	PTGS1
983	MOL009278	Phosphatidylinositol-4,5-bisphosphate 3-kinase catalytic subunit, gamma isoform	PIK3CG
984	MOL009278	Nuclear receptor coactivator 2	NCOA2
985	MOL009278	DNA topoisomerase II	TOP2
986	MOL005030	Prostaglandin G/H synthase 1	PTGS1
987	MOL005030	Nuclear receptor coactivator 2	NCOA2
988	MOL001510	Progesterone receptor	PGR
989	MOL001510	Nuclear receptor coactivator 2	NCOA2
990	MOL001771	Progesterone receptor	PGR
991	MOL001771	Nuclear receptor coactivator 2	NCOA2
992	MOL001792	Prostaglandin G/H synthase 1	PTGS1
993	MOL001792	Estrogen receptor	ESR1
994	MOL001792	Prostaglandin G/H synthase 2	PTGS2
995	MOL001792	Retinoic acid receptor RXR-alpha	RXRA
996	MOL001792	Beta-2 adrenergic receptor	ADRB2
997	MOL001792	Heat shock protein HSP 90	HSP90
998	MOL001792	Phosphatidylinositol-4,5-bisphosphate 3-kinase catalytic subunit, gamma isoform	PIK3CG
999	MOL001792	mRNA of PKA Catalytic Subunit C-alpha	PRKACA
1000	MOL001792	Beta-lactamase	ampC
1001	MOL001792	Amine oxidase [flavin-containing] B	MAOB
1002	MOL001792	Sodium-dependent serotonin transporter	SLC6A4
1003	MOL001792	cAMP-dependent protein kinase inhibitor alpha	PKIA
1004	MOL003044	Nitric oxide synthase, inducible	NOS2
1005	MOL003044	Prostaglandin G/H synthase 1	PTGS1
1006	MOL003044	Estrogen receptor	ESR1
1007	MOL003044	Androgen receptor	AR
1008	MOL003044	Peroxisome proliferator activated receptor gamma	PPARG
1009	MOL003044	Prostaglandin G/H synthase 2	PTGS2
1010	MOL003044	Dipeptidyl peptidase IV	DPP4
1011	MOL003044	Mitogen-activated protein kinase 14	MAPK14
1012	MOL003044	Glycogen synthase kinase-3 beta	GSK3B
1013	MOL003044	Heat shock protein HSP 90	HSP90
1014	MOL003044	Cell division protein kinase 2	CDK2
1015	MOL003044	Phosphatidylinositol-4,5-bisphosphate 3-kinase catalytic subunit, gamma isoform	PIK3CG
1016	MOL003044	Serine/threonine-protein kinase Chk1	CHEK1
1017	MOL003044	mRNA of PKA Catalytic Subunit C-alpha	PRKACA
1018	MOL003044	Trypsin-1	PRSS1
1019	MOL003044	Nuclear receptor coactivator 2	NCOA2
1020	MOL003044	Nuclear receptor coactivator 1	NCOA1
1021	MOL003044	Calmodulin	CaM
1022	MOL003542	Thrombin	F2
1023	MOL003542	Estrogen receptor	ESR1
1024	MOL003542	Androgen receptor	AR
1025	MOL003542	Peroxisome proliferator activated receptor gamma	PPARG
1026	MOL003542	Coagulation factor Xa	F10
1027	MOL003542	Prostaglandin G/H synthase 2	PTGS2
1028	MOL003542	DNA topoisomerase II	TOP2
1029	MOL003542	Dipeptidyl peptidase IV	DPP4
1030	MOL003542	Glycogen synthase kinase-3 beta	GSK3B
1031	MOL003542	Heat shock protein HSP 90	HSP90
1032	MOL003542	Cell division protein kinase 2	CDK2
1033	MOL003542	Serine/threonine-protein kinase Chk1	CHEK1
1034	MOL003542	Trypsin-1	PRSS1
1035	MOL003542	Proto-oncogene serine/threonine-protein kinase Pim-1	PIM1
1036	MOL003542	Calmodulin	CaM
1037	MOL003542	Prostaglandin G/H synthase 1	PTGS1
1038	MOL003542	Sodium channel protein type 5 subunit alpha	SCN5A
1039	MOL003542	Coagulation factor VII	F7
1040	MOL003542	Vascular endothelial growth factor receptor 2	KDR
1041	MOL003542	Retinoic acid receptor RXR-alpha	RXRA
1042	MOL003542	Mitogen-activated protein kinase 14	MAPK14
1043	MOL003542	Cyclin-A2	CCNA2
1044	MOL003542	Calcium-activated potassium channel subunit alpha 1	KCNMA1
1045	MOL003542	Nuclear receptor coactivator 2	NCOA2
1046	MOL003542	Gamma-aminobutyric-acid receptor alpha-2 subunit	GABRA2
1047	MOL003542	Gamma-aminobutyric acid receptor subunit alpha-1	GABRA1
1048	MOL003542	Ferrichrome-iron receptor	fhuA
1049	MOL003542	CGMP-inhibited 3',5'-cyclic phosphodiesterase A	PDE3A
1050	MOL003542	Potassium voltage-gated channel subfamily H member 2	KCNH2
1051	MOL003542	Glycogen phosphorylase, muscle form	PYGM
1052	MOL000359	Progesterone receptor	PGR
1053	MOL000359	Nuclear receptor coactivator 2	NCOA2
1054	MOL000359	Mineralocorticoid receptor	NR3C2
1055	MOL004380	Prostaglandin G/H synthase 1	PTGS1
1056	MOL004380	Dopamine D1 receptor	DRD1
1057	MOL004380	Muscarinic acetylcholine receptor M3	CHRM3
1058	MOL004380	Potassium voltage-gated channel subfamily H member 2	KCNH2
1059	MOL004380	Muscarinic acetylcholine receptor M1	CHRM1
1060	MOL004380	Androgen receptor	AR
1061	MOL004380	D(1B) dopamine receptor	DRD5
1062	MOL004380	Beta-1 adrenergic receptor	ADRB1
1063	MOL004380	Sodium channel protein type 5 subunit alpha	SCN5A
1064	MOL004380	Muscarinic acetylcholine receptor M5	CHRM5
1065	MOL004380	Prostaglandin G/H synthase 2	PTGS2
1066	MOL004380	Alpha-2A adrenergic receptor	ADRA2A
1067	MOL004380	5-hydroxytryptamine 1A receptor	HTR1A
1068	MOL004380	5-hydroxytryptamine receptor 3A	HTR3A
1069	MOL004380	Muscarinic acetylcholine receptor M4	CHRM4
1070	MOL004380	Delta-type opioid receptor	OPRD1
1071	MOL004380	CGMP-inhibited 3',5'-cyclic phosphodiesterase A	PDE3A
1072	MOL004380	Histamine H1 receptor	HRH1
1073	MOL004380	5-hydroxytryptamine 2A receptor	HTR2A
1074	MOL004380	Sodium-dependent noradrenaline transporter	SLC6A2
1075	MOL004380	Alpha-1A adrenergic receptor	ADRA1A
1076	MOL004380	Gamma-aminobutyric-acid receptor alpha-3 subunit	GABRA3
1077	MOL004380	5-hydroxytryptamine 2C receptor	Htr2c
1078	MOL004380	Muscarinic acetylcholine receptor M2	CHRM2
1079	MOL004380	Alpha-2B adrenergic receptor	ADRA2B
1080	MOL004380	Alpha-1B adrenergic receptor	ADRA1B
1081	MOL004380	Sodium-dependent dopamine transporter	SLC6A3
1082	MOL004380	Beta-2 adrenergic receptor	ADRB2
1083	MOL004380	Alpha-1D adrenergic receptor	ADRA1D
1084	MOL004380	Neuronal acetylcholine receptor subunit alpha-2	CHRNA2
1085	MOL004380	Sodium-dependent serotonin transporter	SLC6A4
1086	MOL004380	D(2) dopamine receptor	DRD2
1087	MOL004380	Mu-type opioid receptor	OPRM1
1088	MOL004380	Gamma-aminobutyric acid receptor subunit alpha-1	GABRA1
1089	MOL004380	5-hydroxytryptamine 1B receptor	HTR1B
1090	MOL004380	Neuronal acetylcholine receptor protein, alpha-7 chain	CHRNA7
1091	MOL004380	Gamma-aminobutyric acid receptor subunit gamma-3	GABRG3
1092	MOL004380	Gamma-aminobutyric acid receptor subunit epsilon	GABRE
1093	MOL004427	Prostaglandin G/H synthase 2	PTGS2
1094	MOL004427	DNA topoisomerase II	TOP2
1095	MOL004427	Nuclear receptor coactivator 2	NCOA2
1096	MOL000006	Prostaglandin G/H synthase 1	PTGS1
1097	MOL000006	Androgen receptor	AR
1098	MOL000006	Prostaglandin G/H synthase 2	PTGS2
1099	MOL000006	Heat shock protein HSP 90	HSP90
1100	MOL000006	Trypsin-1	PRSS1
1101	MOL000006	Nuclear receptor coactivator 2	NCOA2
1102	MOL000006	mRNA of PKA Catalytic Subunit C-alpha	PRKACA
1103	MOL000006	Dipeptidyl peptidase IV	DPP4
1104	MOL000006	Phosphatidylinositol-4,5-bisphosphate 3-kinase catalytic subunit, gamma isoform	PIK3CG
1105	MOL000006	Transcription factor p65	RELA
1106	MOL000006	Epidermal growth factor receptor	EGFR
1107	MOL000006	RAC-alpha serine/threonine-protein kinase	AKT1
1108	MOL000006	Vascular endothelial growth factor A	VEGFA
1109	MOL000006	G1/S-specific cyclin-D1	CCND1
1110	MOL000006	Bcl-2-like protein 1	BCL2L1
1111	MOL000006	Cyclin-dependent kinase inhibitor 1	CDKN1A
1112	MOL000006	Caspase-9	CASP9
1113	MOL000006	72 kDa type IV collagenase	MMP2
1114	MOL000006	Matrix metalloproteinase-9	MMP9
1115	MOL000006	Mitogen-activated protein kinase 1	MAPK1
1116	MOL000006	Interleukin-10	IL10
1117	MOL000006	Retinoblastoma-associated protein	RB1
1118	MOL000006	Cell division protein kinase 4	CDK4
1119	MOL000006	Tumor necrosis factor	TNF
1120	MOL000006	Transcription factor AP-1	JUN
1121	MOL000006	Interleukin-6	IL6
1122	MOL000006	Caspase-3	CASP3
1123	MOL000006	Cellular tumor antigen p53	TP53
1124	MOL000006	NF-kappa-B inhibitor alpha	NFKBIA
1125	MOL000006	Xanthine dehydrogenase/oxidase	XDH
1126	MOL000006	DNA topoisomerase 1	TOP1
1127	MOL000006	E3 ubiquitin-protein ligase Mdm2	MDM2
1128	MOL000006	Amyloid beta A4 protein	App
1129	MOL000006	Interstitial collagenase	MMP1
1130	MOL000006	Proliferating cell nuclear antigen	PCNA
1131	MOL000006	Receptor tyrosine-protein kinase erbB-2	ERBB2
1132	MOL000006	Peroxisome proliferator-activated receptor gamma	PPARG
1133	MOL000006	Heme oxygenase 1	HMOX1
1134	MOL000006	Caspase-7	CASP7
1135	MOL000006	Intercellular adhesion molecule 1	ICAM1
1136	MOL000006	Induced myeloid leukemia cell differentiation protein Mcl-1	MCL1
1137	MOL000006	Baculoviral IAP repeat-containing protein 5	BIRC5
1138	MOL000006	Interleukin-2	IL2
1139	MOL000006	G2/mitotic-specific cyclin-B1	CCNB1
1140	MOL000006	Tyrosinase	TYR
1141	MOL000006	Interferon gamma	IFNG
1142	MOL000006	Interleukin-4	IL4
1143	MOL000006	DNA topoisomerase 2-alpha	TOP2A
1144	MOL000006	Glutathione S-transferase P	GSTP1
1145	MOL000006	Baculoviral IAP repeat-containing protein 4	XIAP
1146	MOL000006	Solute carrier family 2, facilitated glucose transporter member 4	SLC2A4
1147	MOL000006	Insulin receptor	INSR
1148	MOL000006	CD40 ligand	CD40LG
1149	MOL000006	Prostaglandin E synthase	PTGES
1150	MOL000006	Kinetochore protein Nuf2	NUF2
1151	MOL000006	Adenylate cyclase type 2	ADCY2
1152	MOL000006	Hepatocyte growth factor receptor	MET
1153	MOL000622	Gamma-aminobutyric-acid receptor alpha-2 subunit	GABRA2
1154	MOL000622	Gamma-aminobutyric acid receptor subunit alpha-1	GABRA1
1155	MOL000622	Glutamate receptor 2	GRIA2
1156	MOL000622	Gamma-aminobutyric-acid receptor subunit alpha-6	GABRA6
1157	MOL001941	Thrombin	F2
1158	MOL001941	Muscarinic acetylcholine receptor M1	CHRM1
1159	MOL001941	Prostaglandin G/H synthase 2	PTGS2
1160	MOL001941	Gamma-aminobutyric acid receptor subunit alpha-1	GABRA1
1161	MOL001941	Dipeptidyl peptidase IV	DPP4
1162	MOL001941	Phosphatidylinositol-4,5-bisphosphate 3-kinase catalytic subunit, gamma isoform	PIK3CG
1163	MOL001941	mRNA of PKA Catalytic Subunit C-alpha	PRKACA
1164	MOL001941	Amine oxidase [flavin-containing] B	MAOB
1165	MOL002714	Prostaglandin G/H synthase 1	PTGS1
1166	MOL002714	Androgen receptor	AR
1167	MOL002714	Prostaglandin G/H synthase 2	PTGS2
1168	MOL002714	Heat shock protein HSP 90	HSP90
1169	MOL002714	mRNA of PKA Catalytic Subunit C-alpha	PRKACA
1170	MOL002714	Dipeptidyl peptidase IV	DPP4
1171	MOL002714	Phosphatidylinositol-4,5-bisphosphate 3-kinase catalytic subunit, gamma isoform	PIK3CG
1172	MOL002714	CGMP-inhibited 3',5'-cyclic phosphodiesterase A	PDE3A
1173	MOL002714	Trypsin-1	PRSS1
1174	MOL002714	Nuclear receptor coactivator 2	NCOA2
1175	MOL002714	Nuclear receptor coactivator 1	NCOA1
1176	MOL002714	Calmodulin	CaM
1177	MOL002714	Transcription factor p65	RELA
1178	MOL002714	RAC-alpha serine/threonine-protein kinase	AKT1
1179	MOL002714	Vascular endothelial growth factor A	VEGFA
1180	MOL002714	Apoptosis regulator Bcl-2	BCL2
1181	MOL002714	Proto-oncogene c-Fos	FOS
1182	MOL002714	Apoptosis regulator BAX	BAX
1183	MOL002714	Matrix metalloproteinase-9	MMP9
1184	MOL002714	Caspase-3	CASP3
1185	MOL002714	Cellular tumor antigen p53	TP53
1186	MOL002714	Hypoxia-inducible factor 1-alpha	HIF1A
1187	MOL002714	Fos-related antigen 1	FOSL1
1188	MOL002714	Fos-related antigen 2	FOSL2
1189	MOL002714	Cell division control protein 2 homolog	CRK2
1190	MOL002714	G2/mitotic-specific cyclin-B1	CCNB1
1191	MOL002714	Myeloperoxidase	MPO
1192	MOL002714	Aryl hydrocarbon receptor	AHR
1193	MOL002714	Insulin-like growth factor II	IGF2
1194	MOL002714	Cytochrome c	CYCS
1195	MOL002714	Arachidonate 12-lipoxygenase, 12S-type	ALOX12
1196	MOL002714	Nuclear factor of activated T-cells, cytoplasmic 1	NFATC1
1197	MOL002714	Tudor domain-containing protein 7	TDRD7
1198	MOL002714	Egl nine homolog 1	EGLN1
1199	MOL002714	NADPH oxidase 5	NOX5
1200	MOL002714	Fatty acid-binding protein, epidermal	FABP5
1201	MOL002714	Apolipoprotein D	APOD
1202	MOL004941	Prostaglandin G/H synthase 1	PTGS1
1203	MOL004941	Estrogen receptor	ESR1
1204	MOL004941	Prostaglandin G/H synthase 2	PTGS2
1205	MOL004941	Retinoic acid receptor RXR-alpha	RXRA
1206	MOL004941	CGMP-inhibited 3',5'-cyclic phosphodiesterase A	PDE3A
1207	MOL004941	Beta-2 adrenergic receptor	ADRB2
1208	MOL004941	Heat shock protein HSP 90	HSP90
1209	MOL004941	Phosphatidylinositol-4,5-bisphosphate 3-kinase catalytic subunit, gamma isoform	PIK3CG
1210	MOL004941	Beta-lactamase	ampC
1211	MOL004941	Amine oxidase [flavin-containing] B	MAOB
1212	MOL004941	mRNA of PKA Catalytic Subunit C-alpha	PRKACA
1213	MOL004941	cAMP-dependent protein kinase inhibitor alpha	PKIA
1214	MOL004941	Calmodulin	CaM
1215	MOL004941	Gamma-aminobutyric acid receptor subunit alpha-1	GABRA1
1216	MOL004941	Sodium-dependent serotonin transporter	SLC6A4
1217	MOL006331	Prostaglandin G/H synthase 1	PTGS1
1218	MOL006331	Androgen receptor	AR
1219	MOL006331	Prostaglandin G/H synthase 2	PTGS2
1220	MOL006331	Dipeptidyl peptidase IV	DPP4
1221	MOL006331	Heat shock protein HSP 90	HSP90
1222	MOL006331	Phosphatidylinositol-4,5-bisphosphate 3-kinase catalytic subunit, gamma isoform	PIK3CG
1223	MOL006331	Amine oxidase [flavin-containing] B	MAOB
1224	MOL006331	mRNA of PKA Catalytic Subunit C-alpha	PRKACA
1225	MOL001607	Progesterone receptor	PGR
1226	MOL001607	Nuclear receptor coactivator 2	NCOA2
1227	MOL004125	Prostaglandin G/H synthase 1	PTGS1
1228	MOL004125	Prostaglandin G/H synthase 2	PTGS2
1229	MOL004125	Beta-2 adrenergic receptor	ADRB2
1230	MOL004125	Heat shock protein HSP 90	HSP90
1231	MOL004125	mRNA of PKA Catalytic Subunit C-alpha	PRKACA
1232	MOL005043	Progesterone receptor	PGR
1233	MOL005317	Androgen receptor	AR
1234	MOL005317	Mineralocorticoid receptor	NR3C2
1235	MOL005318	Prostaglandin G/H synthase 1	PTGS1
1236	MOL005318	Prostaglandin G/H synthase 2	PTGS2
1237	MOL005318	Heat shock protein HSP 90	HSP90
1238	MOL005344	Apoptosis regulator BAX	BAX
1239	MOL005344	Tumor necrosis factor	TNF
1240	MOL005344	Caspase-3	CASP3
1241	MOL005344	Prostaglandin G/H synthase 2	PTGS2
1242	MOL005344	NF-kappa-B inhibitor alpha	NFKBIA
1243	MOL005344	Interleukin-1 beta	IL1B
1244	MOL005344	Caspase-1	CASP1
1245	MOL005344	Interferon gamma	IFNG
1246	MOL005344	Pituitary adenylate cyclase-activating polypeptide	ADCYAP1
1247	MOL005344	Proteasome assembly chaperone 1	PSMG1
1248	MOL005344	Dual specificity mitogen-activated protein kinase kinase 4	MAP2K4
1249	MOL005344	Solute carrier family 2, facilitated glucose transporter member 4	SLC2A4
1250	MOL005348	Mineralocorticoid receptor	NR3C2
1251	MOL005348	Nuclear receptor coactivator 2	NCOA2
1252	MOL005376	Glucocorticoid receptor	NR3C1
1253	MOL005399	Progesterone receptor	PGR
